## Diet composition of introduced Barn Owls (*Tyto alba javanica*) in urban area in comparison with agriculture settings

Safwan Saufi<sup>1¶</sup>, Shakinah Ravindran<sup>1¶</sup>, Noor Hisham Hamid<sup>2&</sup>, Cik Mohd Rizuan Zainal Abidin<sup>3&</sup>, Hamdan Ahmad<sup>1,4&</sup>, Abu Hassan Ahmad<sup>1&</sup> and Hasber Salim<sup>1,4¶\*</sup>

<sup>1</sup>Barn Owl and Rodent Research Group (BORG), School of Biological Sciences, Universiti Sains Malaysia, 11800 Penang, Malaysia.

<sup>2</sup>FGV Agri Services Sdn Bhd, Tun Razak Agricultural Research Centre, 27000, Jerantut, Pahang

<sup>3</sup>FGV R&D Sdn Bhd, Tun Razak Agricultural Research Centre, 27000, Jerantut, Pahang.

<sup>4</sup>Vector Control and Research Unit, School of Biological Sciences, Universiti Sains Malaysia, 11800 Penang, Malaysia.

\*Corresponding author

E-mail: [hasbersalim@usm.my](mailto:hasbersalim@usm.my) (HS)

¶These authors contributed equally to the work.

&These authors also contributed equally to the work.

## 1 **Abstract**

2 This study investigated the diet of introduced barn owls (*Tyto alba javanica*, Gmelin) in the  
3 urban area of the Main Campus of Universiti Sains Malaysia, Penang, Malaysia, based on  
4 collected regurgitated pellets. We also compared the diet of introduced urban barn owls with  
5 the diet of barn owls from two agricultural areas, i.e. oil palm plantations and rice fields. Pellet  
6 analysis of barn owls introduced in the urban area showed that commensal Norway rats, *Rattus*  
7 *norvegicus*, made up the highest proportion of the diet (65.37% prey biomass) while common  
8 shrews, *Suncus murinus* were the second highest consumed prey (30.12% prey biomass).  
9 Common plantain squirrel, *Callosciurus notatus*, made up 4.45% of the diet while insects were  
10 taken in a relatively small amount (0.046% prey biomass). Introduced barn owls showed a  
11 preference for medium-sized prey, i.e. 40 to 120g (52.96% biomass and 38.71% total). In  
12 agricultural areas, *Rattus argentiventer* predominated the diet of barn owls (98.24% prey  
13 biomass) in rice fields while Malayan wood rats, *Rattus tiomanicus*, were the most consumed  
14 prey in oil palm plantations (99.5% prey biomass). Food niche breadth value was highest for  
15 barn owls introduced in an urban area with a value of 2.90, and 1.06 in rice fields and 1.22 in  
16 oil palm plantations. Our analysis reiterates the prey preference of barn owls in various  
17 landscapes for small mammals. Our results also indicate the suitability of utilizing barn owls  
18 as a biological control not only in agricultural areas, but also as a biological control agent for  
19 commensal rodent pests in urban areas.

20 **Keywords:** barn owl, diet, pellet analysis, urban, agriculture.

21

22

23

## 24 **Introduction**

25 The barn owl, *Tyto alba* (Tytonidae), is a common species of owls which occurs on almost all  
26 continents and in most open lands and farmlands (Bunn et al., 1982; Taylor, 1994). Like many  
27 other cosmopolitan nocturnal raptors, barn owls display an astonishing breadth of habitat  
28 association and have been able to adapt and persist in areas that are becoming urbanized  
29 (Hindmarch et al., 2017). The diet of barn owls has been well studied throughout its range  
30 because of the ease of identifying prey remnants recovered inside regurgitated pellets. Owls  
31 swallow their prey whole and expel pellets, which are composed of undigested remains such  
32 as bones, compacted in hair and feathers (Taylor, 1994). Analysis of barn owl pellets have  
33 provided information on the diet composition of owls and dynamics of prey species  
34 communities within the owl foraging areas (Alivizatos & Goutner, 1999; Kitowski, 2013).

35 The diet of barn owls in agricultural areas has been extensively studied throughout its range  
36 (Jaksic et al., 1982; Marti, 2010; Paspali et al., 2013). In most part of their foraging range, barn  
37 owls feed primarily on small mammals, i.e. rats, mice, voles and shrews, with birds, insects,  
38 amphibians, reptiles and invertebrates taken in relatively smaller amounts (Bunn et al., 1982).  
39 In Peninsular Malaysia, several studies on the food selection of barn owl in major agricultural  
40 crop areas report rats as the major prey. Diet analysis of the owl's regurgitated pellets show  
41 that rats comprise more than 98% of the prey in oil palm plantations (Lenton, 1984) and 94.7%  
42 in rice fields (Hafidzi et al., 1999).

43 Its renowned role as an efficient small mammal predator has led to barn owls being introduced  
44 in various landscapes. Barn owls have been introduced in islands (Au & Swedberg, 1966;  
45 Emmerson & Ascani, 1985), agricultural areas (Hafidzi & Naim, 2003b; Rizuan et al., 2017)  
46 and semi-urban areas (Meyer, 2008) for the purpose of controlling pest rodent populations.  
47 Barn owls are also translocated as part of reintroduction programs for declining local barn owl

48 populations (Meek et al., 2003). In this study, Southeast Asian barn owls, *Tyto alba javanica*,  
49 were translocated from their native agricultural habitats and introduced to the urban-garden  
50 area of the Main Campus of Universiti Sains Malaysia to serve as a biological control agent  
51 against the rat pest population. Here, we report the analysis of the diet composition of  
52 introduced barn owls in an urban area, and compared the diet of introduced urban barn owls to  
53 the diet of barn owls in oil palm plantations and rice fields in Peninsular Malaysia.

54

## 55 **Materials and methods**

56 This study was carried out in strict accordance with the recommendations in the Animal  
57 Research and Service Centre, Universiti Sains Malaysia (USM). The study protocol was  
58 approved by the Animal Ethics Committee USM (Approval number: USM / Animal Ethics  
59 Approval / 2015 / (96) / (629)). Permit for the study was approved by the Department of  
60 Wildlife and National Parks, Peninsular Malaysia (Permit number: JPHL&TN(IP): 60-4/1/13  
61 Jilid 20 (28)).

### 62 *Study area and introduced barn owls*

63 In total, 24 barn owls were released intermittently from April 2016 to August 2018 in the urban-  
64 garden area of the Main Campus of Universiti Sains Malaysia (USM), Penang, Malaysia  
65 (5.3579° N, 100.2943° E). Prior to the release of barn owls, 14 artificial nest boxes were set up  
66 around on the campus area. Providing nest boxes is a common practice to attract barn owls and  
67 increase nesting performance and hence sustain barn owl population. Two types of artificial  
68 nest boxes, i.e. wooden and fibreglass, were installed early in January 2016 and scattered  
69 around the campus at open areas of vegetation (Figure 1).

70 The translocated barn owls were harvested from three different locations in Peninsular  
71 Malaysia; oil palm plantations at the Tun Razak Agricultural Research Centre, Bandar Jengka  
72 Pahang (3.777967° N, 102.517238° E), rice fields of Bumbung Lima, Kepala Batas, Pulau  
73 Pinang (5.51707° N, 100.4265° E) and rice fields in the Kerian District, Parit Buntar, Perak  
74 (5.0081° N, 100.5394° E). The owls were temporarily held in the USM Aviary (5.35791944°  
75 N, 100.29416667° E) for about one month before release to allow the birds to acclimatize to  
76 their new urban surroundings.

77 All introduced barn owls were banded with customized metal leg bands prior to release.  
78 Transmitters were fitted to the owls using backpack style (Saufi et al., 2018). The transmitter  
79 and harness weighed approximately 9 g, i.e. less than 2 % of total body mass of the barn owls  
80 (range between 430 g to 580 g) to avoid affecting bird behaviour and movement (Gaunt et al.,  
81 1997). VHF-radio telemetry (TRX-48S, Wildlife Materials Inc.) was used to observe the post-  
82 release movement of released barn owls. Each owl was followed for at least 10 cumulative  
83 days immediately following its release, starting from dusk (2000 hours) to dawn (0630 hours).  
84 Radio-tracking was initially done from vehicles and when a signal was detected, tracking was  
85 done on foot till the strongest signal could be detected. The last detected location of an owl  
86 during a tracking session is crucial as it determines the owl roosting site of the day, from which  
87 there is a high probability of finding a regurgitated pellet.

88 Regurgitated pellets of introduced barn owls were collected from August 2018 to December  
89 2018 at various locations scattered around the campus. Several structures were identified within  
90 the campus that were used regularly by barn owls as perching and roosting sites and pellets  
91 were collected on the ground below these sites.

92 <Insert Figure 1> Figure 1: Study site of introduced barn owl and location of nest boxes.

93 *Diet of barn owls in agricultural areas*

94 Barn owls in rice fields were sampled in rice fields of Bagan Serai, Perak and Kepala Batas,  
95 Penang. Surveys for barn owl nest boxes and roosting sites were conducted from August 2017  
96 to July 2018. Barn owls in oil palm plantations were sampled from the plantations in Tun Razak  
97 Agricultural Research Centre, Bandar Jengka, Pahang. Survey for pellet samples were  
98 conducted July 2017 to August 2018. Pellets samples from both agricultural settings were  
99 collected in and around nest boxes and identified perching sites of barn owls.

#### 100 *Pellet analysis*

101 Pellets were soaked in water individually and processed carefully by taking them apart (Terry,  
102 2004). Bone remnants from pellets were preserved in alcohol prior to identification. For rodent  
103 identification, skull and lower jaw of the prey were used for identification down to species  
104 level following the identification key of Harrison (1962). A scientific calliper (Mitutoyo U.S.A)  
105 was used to measure the size of bones to determine the size of the prey (0.01 mm accuracy). If  
106 a skull and lower jaw were not present, measurement of the femur and humerus bone was done  
107 to distinguish between juveniles and adults. Insects found in pellets were identified using  
108 Borror and White (1970) while other vertebrate prey were determined up to family level using  
109 identification keys by Beisaw (2013).

110 The biomass of prey items recovered from pellets were estimated using a standard log-log  
111 regression of right mandible length as a function of body weight (Morris, 1979; Hamilton,  
112 1980; Marti, 2009). The food niche breadth (FNB) of barn owls in all the areas was calculated  
113 to determine the dietary diversity of barn owls in each habitat. Food niche breadth (FNB)  
114 (Levins, 1968) was calculated as follows:

$$115 \text{ FNB} = \frac{1}{\sum_{i=1}^n p_i^2}$$

116 Where  $p$  is the proportion to prey category  $i$  in the barn owl diet. Higher values on this index  
 117 represent a higher diversity of the diet.

118

## 119 **Results**

### 120 *Diet of barn owls*

121 A total of 252 pellets were collected and 10 groups of animal taxa were identified from prey  
 122 remnants from all three different study habitats (Table 1). Small mammals from the family  
 123 Muridae were the staple prey in all three different habitats, though the main prey species  
 124 differed in each habitat.

125

126 Table 1: Diet composition of introduced urban barn owls and in agricultural areas.

| Prey species            | Urban (%) |             | Rice field (%) |             | Oil palm Plantation (%) |             |
|-------------------------|-----------|-------------|----------------|-------------|-------------------------|-------------|
|                         | Biomass   | Individuals | Biomass        | Individuals | Biomass                 | Individuals |
| <i>R. norvegicus</i>    | 65.37     | 45.05       | 0              | 0           | 0                       | 0           |
| <i>R. argentiventer</i> | 0         | 0           | 98.24          | 96.77       | 0                       | 0           |
| <i>R. tiomanicus</i>    | 0         | 0           | 0              | 0           | 94.35                   | 90.16       |
| House shrew             | 30.12     | 35.16       | 1.28           | 2.15        | 0                       | 0           |
| Bird                    | 0         | 0           | 0              | 0           | 0.76                    | 1.63        |
| Reptiles                | 0         | 0           | 0              | 0           | 0.66                    | 0.81        |
| Amphibian               | 0         | 0           | 0.46           | 1.07        | 0.47                    | 1.63        |
| Grasshopper             | 0.11      | 5.49        | 0              | 0           | 0.02                    | 3.27        |
| Termites                | 0.002     | 12.10       | 0              | 0           | 0                       | 0           |
| Plantain squirrel       | 4.45      | 2.20        | 0              | 0           | 3.71                    | 2.45        |
| FNB                     | 2.90      |             | 1.06           |             | 1.22                    |             |

127 \*FNB = food niche breadth

128

129 A total of 62 individual pellets were collected from barn owls introduced in urban areas and  
 130 95.49% of prey biomass of the diet were composed of commensal rodent pests. The Norway  
 131 rat, *Rattus norvegicus* was the most preyed on; making up 45.05% of total pellet contents and

132 65.37% of prey biomass. House shrews, *Suncus murinus* were the second highest consumed  
133 prey item of barn owls in the urban area (35.16 % of pellet content, 30.12 % prey biomass).  
134 Another rodent prey identified was the common plantain squirrel, *Callosciurus notatus*, with 2  
135 prey items (2.20% total, 4.45% biomass). Other prey identified in pellets were insects;  
136 grasshoppers (9.26% total and 0.11% biomass) and termites (12.65% total and 0.002%  
137 biomass).

138 In rice fields, a total of 90 pellets were collected with rodent pests being making up 99.52% of  
139 the prey biomass. The rice field rat, *Rattus argentiventer*, was the major diet of barn owls  
140 (96.77% total and 98.24% biomass) while shrews constituted a smaller fraction of the diet at  
141 2.15% of total prey individuals and 1.28% of prey biomass. Amphibians were also recorded in  
142 the diet of barn owls in rice fields (1.07% total and 0.46% of prey biomass).

143 A total of 100 pellets were collected in oil palm plantations and 92.83% of total prey were  
144 rodents. The Malayan Wood Rat, *Rattus tiomanicus*, was the main prey species in terms of  
145 prey total (90.16%) and prey biomass (94.35%). Squirrels were also found in barn owl pellets  
146 with the diurnal rodent making up 2.45% of individual prey total and 3.71% of prey biomass.  
147 Grasshoppers were recorded as the second highest individual prey of barn owls in oil palm  
148 plantations (3.27%), though this group only make a small fraction of prey biomass (0.02%). A  
149 small percentage of the barn owl diet in oil palm plantations were made up of birds, reptiles  
150 and amphibians (4.07% total and 1.89% biomass).

151 The food niche breadth (FNB) of barn owls in all the areas was calculated to determine the  
152 dietary diversity of barn owls in each habitat (Table 1). The released barn owls in urban area  
153 recorded the highest FNB value at 2.90, indicating a high diet diversity of the introduced barn  
154 owls in the urban area. FNB value was second highest for barn owls in oil palm plantations  
155 (1.22 FNB) and barn owls in rice fields recorded the lowest FNB value (1.06 FNB).



156 *Prey weight of introduced urban barn owls*

157 The biomass of identified preys inside the collected pellets were estimated using a standard  
158 log-log regression of right mandible length (mm) as a function body weight (g) as described  
159 by Hamilton (1980). Figure 2 shows the weight groups of introduced urban barn owl prey by  
160 numbers and biomass. Weights of prey were identified as extra small (< 3g), small (3-40g),  
161 medium (40-120 g) and large (120-160 g). Medium-sized prey were the most preferred weight  
162 group by owls (52.96% biomass and 38.71% total). Small-sized prey were the second highest  
163 preferred prey of introduced barn owls, making up 31.18% total prey consumed. However due  
164 to the small size, this prey category only contributed 16% of the prey biomass. Large-sized  
165 prey made up 12.90% of total prey and more than 30% of prey biomass. The extra small-sized  
166 prey made up 17.20% of total prey and contribute only 0.15% of prey biomass.

167 <Insert Figure 2> Figure 2: Percentages of individual and prey biomass of pellets of barn owls  
168 introduced in an urban areas.

169 As Norway rats were the most preferred prey of introduced barn owls in the urban area, further  
170 analysis was carried out on the size of the rats. Our analysis showed that the most consumed  
171 weight of rats were medium-sized rats, i.e. individuals weighing 80 to 100 g (Figure 3).  
172 Seventeen individual medium-sized rats were consumed (44.74%). Twelve small-sized rats  
173 weighing from 40 to 80 g were the second highest weight group consumed by barn owls  
174 (31.58%) and the less consumed weight group were large-sized rats weighing more than 120 g  
175 (9 individuals, 23.68%). Norway rats weighing less than 40 g and more than 160 g were not  
176 found in our pellet analysis.

177 <Insert Figure 3> Figure 3: Percentage of size of Norway rats, *R.norvegicus*, prey consumed  
178 by barn owls introduced to an urban area.

179 **Discussion**

180 *Diet of introduced barn owl and in agricultural landscapes.*

181 The barn owls in this study that were introduced and released in an urban area were seen  
182 roosting and perching in trees, roof spaces of buildings and houses, as well as abandoned  
183 structures. The owls were also seen hunting in open grass habitats near roadsides, human  
184 settlements, and backyards of shop lots. One of the barn owls also started occupying one of our  
185 installed nest boxes near the aviary, indicating the successful of release of barn owls in an urban  
186 area. On the other hand, a substantial amount of released barn owls in this study were  
187 untraceable a week after their release. These released young barn owls dispersed further away  
188 from the release site and are probably foraging around the urban areas of Penang Island or  
189 could have travelled further to mainland Peninsular Malaysia (Saufi et al., 2019).

190 Similar to various studies on the diet of barn owls, our study reports that barn owls in  
191 agricultural areas and urban areas prey mostly on small mammals. Norway rats and house  
192 shrews (80.12% total, 95.49% prey biomass) were the dominant prey group in the diet of barn  
193 owls in the urban area. Clark and Bunck (1991) reported that barn owls do consume commensal  
194 rodents along their distribution, though only in low frequencies. Our study shows that  
195 introduced barn owls were able to adapt to an urban setting and consume abundant urban rodent  
196 species. The high number of Norway rats and house shrew consumed by urban barn owls  
197 indicate the owls managed to hunt close to their release site and did not have to travel a great  
198 distance for more suitable open hunting grounds. Studies by Álvarez-Castañeda et al. (2004)  
199 in Mexico and Magrini and Facure (2008) in Brazil reported that pellets from barn owls in  
200 periurbans areas contain none to very little prey remnants from urban areas, suggesting that  
201 barn owls spend more time hunting in areas away from human settlements. In Canada,  
202 Hindmarch and Elliot (2015) reported that barn owls retained their preference for voles despite  
203 being in an urban landscape, although rats were consumed in higher amounts in urban areas.

204 The commensal rodent pests, Norway rats, *R. norvegicus*, and Black rats, *R. rattus*, are among  
205 the most widespread urban pest species in the world that resides frequently in close proximity  
206 to human habitation and are rarely found in the wild (Feng & Himsworth, 2014). The  
207 substantial occurrence of Norway rats inside the pellets of introduced barn owls show that the  
208 barn owls are taking advantage of the abundance of this pest species. Common house shrews  
209 were the second most consumed prey of barn owls in urban areas. These rodent species are the  
210 reported principal prey species in barn owl diet by several studies (Glue, 1967; Love et al.,  
211 2000; Hindmarch & Elliot, 2015; Horváth et al., 2018) and this species are more abundant in  
212 urban settings compared to agricultural settings (Chang et al., 1999). During tracking of  
213 released barn owls, Norway rats and house shrews were observed and frequently encountered  
214 in residential neighbourhoods, eateries, garbage dump areas and commercial areas within the  
215 study site (personal observation). It is however interesting to note that other detrimental rodent  
216 pests, i.e. house mice and roof rats, were not found in collected pellets despite being captured  
217 occasionally during rat trapping sessions as we conducted a study on population diversity of  
218 rats in urban areas around Penang Island. Timm (1994) documented that house mice and roof  
219 rats are typically found inside buildings and house mice rarely travel outside. Meanwhile,  
220 Norway rats and house shrews mainly inhabit and forage in open habitats (Timm, 1994), hence  
221 the two species inhabiting open areas and vegetation were the primary source of food for owls  
222 (Bonvicino & Bezerra, 2003).

223 Barn owls have been well documented to take advantage of other temporarily abundant types  
224 of prey that are vastly different from their usual diet, though extreme exceptions are unusual  
225 and usually occur in situations where small rodents are absence or scarce (Taylor, 1994). In  
226 Malaysia, most studies report that the diet of *T. alba javanica* is composed more than 90% of  
227 rats (Smal, 1990; Puan et al., 2011), with barn owls also preying on shrews, squirrels, birds and  
228 lizards in smaller numbers (Smal, 1990). Urban barn owls in this study consumed small rodents

229 from the family *Sciuridae*. The common plantain squirrel, an uncommon barn owl prey,  
230 constituted a small fraction in the diet of urban barn owls (2.20% total, 4.45% biomass). An  
231 interesting result from our analysis is that there were no bird remnants found in the pellets of  
232 urban barn owls despite the abundant occurrence of passerine birds in our study site. In contrast,  
233 several reports analysing the diet of barn owls in rural and urban areas document that Norway  
234 rat, *R. norvegicus* and birds make up a high proportion of the diet of owls (Salvati et al., 2002;  
235 Teta et al., 2012; Hindmarch & Elliot, 2015). The pellet analysis of urban barn owls also  
236 showed that the owls preyed on insects, i.e. grasshoppers and termites. Though infrequent, barn  
237 owls have been reported to consume a high amount of insects, such as termites (e.g. Taylor,  
238 1994) and locusts (e.g. Szabo et al., 2003; Shehab, 2005).

239

#### 240 *Comparing diet of introduced urban barn owls and barn owls in agricultural areas*

241 Though members of the Muridae family dominate the diet of barn owls in all habitats, the main  
242 prey species differed by habitat. *Rattus norvegicus* were the most preyed upon by introduced  
243 urban owls while *R.tiomanicus* and *R.argentiventer* were the most preyed upon small mammal  
244 in oil palm plantations and rice fields respectively. The barn owl prey-species preference in  
245 agricultural areas from our study is similar to other reports by Hafidzi and Naim (2003a) of  
246 barn owls in rice fields and Lenton (1984) of barn owls in oil palm plantations.

247 Food-niche breadth value of barn owls in the study was highest in urban areas compared to  
248 agricultural areas. There was a higher component of non-rodent prey items in urban areas  
249 compared to agricultural lands, with squirrels and insects accounting for 19.79% of individual  
250 prey and 4.51% of total prey biomass of owls in urban areas. This observation is similar to  
251 reports of Salvati et al. (2002) and Hindmarch et al. (2017) whom report an increased in non-  
252 rodent prey items in the pellets of barn owls as their habitat becomes more urbanized. Various

253 food-niche studies showed barn owl prey selection was associated with rodent accumulations  
254 and responded to the density of rodents (e.g. Marti, 1988; Taylor, 1994; Leveau et al., 2006;  
255 Bernard et al., 2010; Marti, 2010; Milana et al., 2016). Similar to other food-niche analysis of  
256 barn owls in Europe (e.g., Milchev, 2015; Horváth et al., 2018), North America (Marti, 1988;  
257 2010) and South America (e.g. Leveau et al., 2006; Teta et al., 2012), the low values of niche  
258 breadth analysis from agricultural areas in this study reflect the high abundance of an available  
259 and profitable prey, i.e. the dominance of *R.tiomanicus* and *R.argentiventer* in oil palm  
260 plantations and rice fields respectively. It is fairly well established that *R.argentiventer* is  
261 common in rice fields (Lam, 1983; 1988) and *R.tiomanicus* is common in oil palm plantations  
262 (Wood & Liau, 1984).

263

#### 264 *Prey size preference of urban barn owls*

265 Morphological features, such as body size and conspicuousness, and behaviour can also affect  
266 prey vulnerability to predation by barn owls (Derting & Cranford, 1989). Studies on differential  
267 prey selection by barn owls yield differing and often, contrasting results. Some studies show  
268 barn owls have an affinity to feed on smaller prey (e.g. Dickman et al., 1991; Rizuan *et al.*,  
269 2017) while other studies have reported a tendency to feed on larger prey (Derting & Cranford,  
270 1989; Castro & Jaksic, 1995). Our analysis show that barn owls prefer medium-sized Norway  
271 rats (40 to 120g) in urban areas, a finding similarly reported by Gaunt et al. (1997) and  
272 Hindmarch and Elliott (2015).

273 Barn owl diet also depends on the abundance of food supply, prey accessibility, which is  
274 affected by habitat characteristics, and general opportunistic feeding strategy (Taylor, 1994;  
275 Bond et al., 2005; Horváth et al., 2018; Arlettaz et al., 2010). As opportunistic predators, barn  
276 owls will hunt to maximize their nutrient intake and minimize energy expenditure (MacArthur

277 & Pianka, 1966), hence prey size would play an important role in determining barn owl prey  
278 selection. Larger prey may be easy to locate but the energy gained might not compensate for  
279 the energy lost from subduing the prey (Ille, 1991), while smaller prey are hard to locate and  
280 more agile, hence energy gained might not compensate for the energy used to search and hunt  
281 for the prey (Colvin & McLean, 1986).

### 282 *Barn owls as urban rodent pest biological control agents*

283 There are various ways to study the impact of released barn owls. Pellet analysis is a well-  
284 known and frequently used method to analyse owl prey content and preference (e.g., Bonvicino  
285 & Bezerra, 2003; Andrade et al., 2016). Meyer (2008) who studied the impact of released barn  
286 owls in a semi-urban area in Johannesburg evaluated the rodent population size using live-  
287 trapping before and after barn owl releases. Meyer (2008) reported a declining rat population  
288 following the release of barn owls. While these are positive reports, trap catchability could  
289 have biased the results as rats may developed trap shyness over time (Griffin, 2004).  
290 Additionally, some studies report that the mere presence of barn owls simply affects the  
291 behaviour of prey, i.e. the prey ventures less in the open (Abramsky et al., 1996).

292 Though some studies question the ability of barn owls to significantly reduce rodent  
293 populations (Van Vuren et al., 1998; Marti et al., 2005), results from this study show an affinity  
294 for barn owls to consume abundant commensal rodent pest species. While our results are  
295 preliminary, more studies are planned to further study the impact of introduced barn owls  
296 controlling rodent pest populations in an urban setting. Additionally, as commensal Norway  
297 rats are abundant and breed year-round, introduced urban barn owls would not have difficulty  
298 maintaining a high level of energy intake (Puan et al, 2011) and it is unlikely that the owls  
299 would switch prey species (Puan et al., 2011).

### 300 **Conclusion**

301 Our study shows that barn owls in urban and agricultural areas are opportunistic predators that  
302 hunt almost exclusively on small mammal rats. Our study also showed that barn owls can adapt  
303 their prey species preference in different areas according to variations in small mammal  
304 abundance. Barn owls introduced in urban areas mostly consumed Norway rats and house  
305 shrews, which are notorious commensal rodent pests. Squirrels and insects were also preyed  
306 by these introduced urban barn owls but made up only a small fraction of their diet. Our results  
307 strongly indicate that barn owls introduced to urban areas have the potential to be an effective  
308 biological control agent against commensal rat pest populations following their high  
309 consumption by barn owls.

310

311

## 312 **Acknowledgements**

313 We would like to thank Department of Agricultural, Bumbung Lima, Kepala Batas, Penang  
314 and Department of Agricultural Kerian District, Perak for giving permission to carry out our  
315 sampling in their rice fields. The authors also thank FGV Agri Services Sdn. Bhd and FGV  
316 R&D Sdn Bhd for providing the necessary facilities to conduct this study in their oil palm  
317 plantations. This work was supported by the Universiti Sains Malaysia Research University  
318 Grant (1001/PBIOLOGI/811270).

319

## 320 **References**

- 321 Abramsky Z, Strauss E, Subach A, Kotler BP, Riechman A. The effect of barn owls (*Tyto alba*)  
322 on the activity and microhabitat selection of *Gerbillus allenbyi* and *G. pyramidum*. *Oecologia*  
323 1996, 105: 313–319.
- 324 Alivizatos H, Goutner V. Winter diet of the barn owl (*Tyto alba*) and long-eared owl (*Asio*  
325 *otus*) in northeastern Greece: a comparison. *J Raptor Res.* 1999, 33(2): 160-163.



- 326 Álvarez-Castañeda SG, Cárdenas N, Méndez L. Analysis of Mammal Remains from Owl  
327 Pellets (*Tyto alba*) in a Suburban Area in Baja California. *J Arid Environ.* 2004, 59: 59-69.
- 328 Andrade A, de Menezes JFS, Monjeau A. Are owl pellets good estimators of prey abundance?  
329 *Journal of King Saud University – Science* 2016, 28(3): 239-244.  
330 doi:10.1016/j.jksus.2015.10.007
- 331 Arlettaz R, Krähenbühl M, Almasi B, Roulin A, Schaub M. Wildflower areas within revitalized  
332 agricultural matrices boost small mammal populations but not breeding Barn Owls. *J Ornithol.*  
333 2010, 151(3): 553-564.
- 334 Au S, Swedberg G. A progress report on the introduction of the barn owl (*Tyto alba pratincola*)  
335 to the island of Kauai. *Elepaio* 1966, 26: 58-60.
- 336 Beisaw AM. Identifying and interpreting animal bones: A manual. Texas A&M University  
337 Press: Texas; 2013.
- 338 Bernard N, Michelat D, Raoul F, Quéré JP, Delattre P, Giraudoux P. Dietary response of Barn  
339 Owls (*Tyto alba*) to large variations in populations of Common Voles (*Microtus arvalis*) and  
340 European Water Voles (*Arvicola terrestris*). *Can J Zool.* 2010, 88(4): 416–426. DOI:  
341 10.1139/Z10-011
- 342 Bond G, Burnside NG, Metcalfe DJ, Scott DM, Blamire J. The effects of land-use and  
343 landscape structure on barn owl (*Tyto alba*) breeding success in southern England, UK. *Landsc*  
344 *Ecol.* 2005, 20(5): 555-566.
- 345 Bonvicino CR, Bezerra AM. Use of regurgitated pellets of barn owl (*Tyto alba*) for  
346 inventorying small mammals in the Cerrado of Central Brazil. *Stud Neotrop Fauna E.* 2003,  
347 38(1): 1-5.
- 348 Borror DJ, White RE. Insects: Peterson Field Guide. Peterson Field Guide. Series. Houghton  
349 Mifflin: New York; 1970.
- 350 Bunn DS, Warburton A, Wilson RD. The barn owl. A&C Black Publishers Ltd: London; 1982.
- 351 Castro SA, Jaksic FM. Great Horned and Barn owls prey differentially according to the age/size  
352 of a rodent in northcentral Chile. *J Raptor Res.* 1995, 29: 245–249.
- 353 Chang CH, Lin JY, Yu JY-L. Annual reproductive patterns of male house shrews, *Suncus*  
354 *Murinus*, in central Taiwan. *J Mammal.* 1999, 80(3): 845-854.  
355
- 356 Clark-Jr DR, Bunck CM. Trends in North American small mammals found in common barn-  
357 owl (*Tyto alba*) dietary studies. *Can J Zool.* 1991, 69(12): 3093-3102.
- 358 Colvin BA, McLean EB. Food habits and prey specificity of the common barn owl in Ohio.  
359 *Ohio J Sci.* 1986, 86(3): 76-80.
- 360 Derting TL, Cranford JA. Physical and behavioural correlates of prey vulnerability to Barn  
361 Owl (*Tyto alba*) predation. *Am Midl Nat.* 1989, 121: 11–20.



- 362 Dickman CR, Predavec M, Lynam AJ. Differential predation of size and sex classes of mice  
363 by the Barn Owl, *Tyto alba*. *Oikos* 1991, 62: 67–76  
364
- 365 Emmerson K, Ascani M. Régimen alimenticio de *Tyto alba* (Scopoli, 1769) en la isla de  
366 Tenerife (Islas Canarias). *Ardeola* 1985, 32(1): 9-15 (English translation provided)
- 367 Feng AY, Himsforth CG. The secret life of the city rat: a review of the ecology of urban  
368 Norway and black rats (*Rattus norvegicus* and *Rattus rattus*). *Urban Ecosyst.* 2014, 17(1): 149-  
369 162.
- 370 Gaunt AS, Oring LW, Able K, Anderson D, Baptista L, Barlow J, Wingfield J. Guidelines to  
371 the use of wild birds in research. Washington, DC: The Ornithological Council; 1997.
- 372 Glue D. Prey taken by the Barn Owl in England and Wales. *Bird Study* 1967, 14(3): 169-183.
- 373 Griffin A. Social learning about predators: a review and prospectus. *Anim Learn Behav.* 2004,  
374 32(1): 131-140.
- 375 Hafidzi M, Naim M. Prey selection by barn owls in rice fields in Malaysia. *ACIAR Monograph*  
376 *Series* 2003a, 96: 220-223.
- 377 Hafidzi M, Naim M. The use of the barn owl, *Tyto alba*, to suppress rat damage in rice fields  
378 in Malaysia. *ACIAR Monograph Series* 2003b, 96: 274-276.
- 379 Hafidzi M, Zulkifli A, Kamarudin A. Barn owls as a biological control agent of rats in paddy  
380 fields. *Proceedings of the Symposium on Biological Control in the Tropics, Malaysian*  
381 *Agricultural Research and Development Institute (MARDI);* 1999.
- 382 Hamilton K. A technique for estimating Barn Owl prey biomass. *J. Raptor Res.* 1980, 14: 52-  
383 55.
- 384 Harrison JL. The house and field rats of Malaysia. *Bulletin-Institute for Medical Research,*  
385 *Kuala Lumpur* 1962, 12: 1.
- 386 Hindmarch S, Elliott JE. A specialist in the city: the diet of barn owls along a rural to urban  
387 gradient. *Urban Ecosyst.* 2015, 18(2): 477-488.
- 388 Hindmarch S, Elliott JE, Mccann S, Levesque P. Habitat use by barn owls across a rural to  
389 urban gradient and an assessment of stressors including, habitat loss, rodenticide exposure and  
390 road mortality. *Landsc Urban Plan.* 2017, 164: 132-143.
- 391 Horváth A, Morvai A, Horváth GF. Food-niche pattern of the Barn Owl (*Tyto alba*) in  
392 intensively cultivated agricultural landscape. *Ornis Hungarica* 2018, 26(1): 27-40.
- 393 Ille R. Preference of prey size and profitability in Barn Owls *Tyto alba guttata*. *Behaviour*  
394 1991, 116(3): 180-189.
- 395 International Union for Conservation of Nature. Guidelines for Reintroductions and Other  
396 Conservation Translocations. Version 1.0. Gland, Switzerland: IUCN Species Survival  
397 Commission; 2013 p. 2-3.  
398

- 399 Jaksic FM, Seib RL, Herrera CM. Predation by the Barn Owl (*Tyto alba*) in mediterranean  
400 habitats of Chile, Spain and California: A comparative approach. *Am Midl Nat.* 1982, 107:  
401 151-162.
- 402 Kitowski I. Winter diet of the barn owl (*Tyto alba*) and the long-eared owl (*Asio otus*) in Eastern  
403 Poland. *North-western J Zool.* 2013, 9(1).
- 404 Lam Y. Reproduction in the rice field rat, *Rattus argentiventer*. *Malayan Nature Journal* 1983,  
405 36: 249-282.
- 406 Lam Y. Rice as a trap crop for the rice field rat in Malaysia. In: Crabb AC, Marsh RE, editors.  
407 *Proceedings of the 13th Vertebrate Pest Conference* 1988, p. 123–128.
- 408 Lenton GM. The feeding and breeding ecology of Barn Owls *Tyto alba* in peninsular Malaysia.  
409 *Ibis* 1984, 126(4): 551-575.
- 410 Leveau LM, Teta P, Bogdaschewsky R, Pardiñas UF. Feeding habits of the Barn Owl (*Tyto*  
411 *alba*) along a longitudinal-latitude gradient in central Argentina. *Ornitol Neotrop.* 2006,  
412 17(3): 353–362.
- 413 Levins R. *Evolution in changing environments: some theoretical explorations.* Princeton  
414 University Press: Princeton, New Jersey; 1968.
- 415 Love RA, Webon C, Glue DE, Harris S, Harris S. Changes in the food of British Barn Owls  
416 (*Tyto alba*) between 1974 and 1997. *Mammal Review* 2000, 30(2): 107-129.
- 417 MacArthur RH, Pianka ER. On optimal use of a patchy environment. *Am Nat.* 1966, 100(916):  
418 603-609.
- 419 Magrini L, Facure KG. Barn owl (*Tyto alba*) predation on small mammals and its role in the  
420 control of hantavirus natural reservoirs in a periurban area in southeastern Brazil. *Braz J Biol.*  
421 2008, 68(4): 733-740.
- 422 Marti CD. A long-term study of food-niche dynamics in the Common Barn Owl: comparisons  
423 within and between populations. *Can J Zool.* 1988, 66(8): 1803–1812. DOI: 10.1139/z88-261
- 424 Marti CD. A comparison of methods for estimating prey biomass of Barn Owls. *J Raptor Res.*  
425 2009, 43(1), 61-63.
- 426 Marti CD. Dietary Trends of Barn Owls in an Agricultural Ecosystem in Northern Utah. *Wilson*  
427 *J Ornithol.* 2010, 122(1): 60-67. doi:10.1676/09-025.1
- 428 Marti CD, Poole AF, Bevier LR. Barn Owl (*Tyto alba*), *The Birds of North America Online.*  
429 Ithaca: Cornell Lab of Ornithology, 2005. Available from:  
430 <<http://bna.birds.cornell.edu/bna/species/001doi:10.2173/bna.1>>  
431
- 432 Meek W, Burman P, Nowakowski M, Sparks T, Burman N. Barn owl release in lowland  
433 southern England—a twenty-one year study. *Biol Conserv.* 2003, 109(2): 271-282.
- 434 Meyer S. *The Barn Owl as a Control Agent for Rat Populations in Semi-Urban Habitats*  
435 [dissertation]. Johannesburg: University of the Witwatersrand; 2008.  
436

- 437 Milana G, Lai M, Maiorano L, Luiselli L, Amori G. Geographic patterns of predator niche  
438 breadth and prey species richness. *Ecol Res.* 2016, 31(1): 111–115. DOI 10.1007/s11284-015-  
439 1319-6
- 440 Milchev B. Diet of Barn Owl *Tyto alba* in Central South Bulgaria as influenced by landscape  
441 structure. *Turk J Zool.* 2015, 39(5): 933–940. DOI: 10.3906/zoo-1409-24
- 442 Morris P. Rats in the diet of the barn owl (*Tyto alba*). *J Zool.* 1979, 189(4): 540-545.
- 443 Paspali G, Oruçi S, Koni M, Wilson IF, Krystufek B, Bego F. Seasonal variation of small  
444 mammals in the diet of the barn owl (*Tyto alba*) in the Drinos River valley, southern Albania.  
445 *Turk J Zool.* 2013, 37(1): 97-105.
- 446 Puan CL, Goldizen AW, Zakaria M, Hafidzi MN, Baxter GS. Absence of Differential Predation  
447 on Rats by Malaysian Barn Owls in Oil Palm Plantations. *J Raptor Res.* 2011, 45(1): 71-78.  
448
- 449 Rizuan CM, Hafidzi M, Hisyam N, Salim H. Diet preferences and reproduction of translocated  
450 barn owl, *Tyto alba javanica* in captivity. *J Oil Palm Res.* 2017, 29(3): 333-342.
- 451 Salvati L, Ranazzi L, Manganaro A. Habitat preferences, breeding success, and diet of the Barn  
452 Owl (*Tyto alba*) in Rome: Urban versus rural territories. *J Raptor Res.* 2002, 36(3): 224-228.
- 453 Saufi S, Ahmad H, Hassan A, Salim H. Establishment, Home Range and Core Area of  
454 Introduced Barn Owls in Urban-Garden Areas of Minden Campus, Universiti Sains Malaysia.  
455 Proceedings of the 11<sup>th</sup> IMT-GT UNINET Conference; 2018 Dec 11-12; Penang Malaysia.
- 456 Saufi S, Ravindran S, Salim H. Homing instinct of a female Barn Owl, *Tyto alba javanica*. *J*  
457 *Raptor Res.* 2019, (In Press)
- 458 Shehab AH. Food of the Barn owl *Tyto alba* in Southern Syria. *Acta Zool Cracov.* 2005, 48(1-  
459 2): 35-42.
- 460 Smal CM. Predictive modelling of rat populations in relation to use of rodenticides or predators  
461 for control. PORIM occasional paper No. 25. Palm Oil Research Institute Malaysia. Kuala  
462 Lumpur; 1990.
- 463 Szabo J, Astheimer LB, Story PG, Buttemer WA. An ephemeral feast: Birds, locusts and  
464 pesticides. *Wingspan* 2003, 13(3): 10–15.
- 465 Taylor IR. Barn owls: Predator-prey relationships and conservation. Cambridge University  
466 Press: Cambridge, UK; 1994.
- 467 Terry RC. Owl pellet taphonomy: a preliminary study of the post-regurgitation taphonomic  
468 history of pellets in a temperate forest. *Palaios* 2004, 19(5), 497-506.
- 469 Teta P, Herculini C, Cueto G. Variation in the diet of Western Barn Owls (*Tyto alba*) along an  
470 urban-rural gradient. *Wilson J Ornithol.* 2012, 124(3): 589-596.
- 471 Timm RM. House mice. In: Hygnstrom SE, Timm RM, Larson, GE, editors. Prevention and  
472 Control of Wildlife Damage. Cooperative Extension Service, University of Nebraska- Lincoln:  
473 Nebraska, USA; 1994, p. 31-46.

- 474 Van Vuren D, Moore TG, Ingels CA. Prey Selection by Barn Owls Using Artificial Nest Boxes.  
475 Calif Fish Game 1998, 84(3): 127-132.  
476
- 477 Wood B, Liao S. A long-term study of *Rattus tiomanicus* populations in an oil palm plantation  
478 in Johore, Malaysia: II. Recovery from control and economic aspects. J Appl Ecol. 1984, 21:  
479 465-472



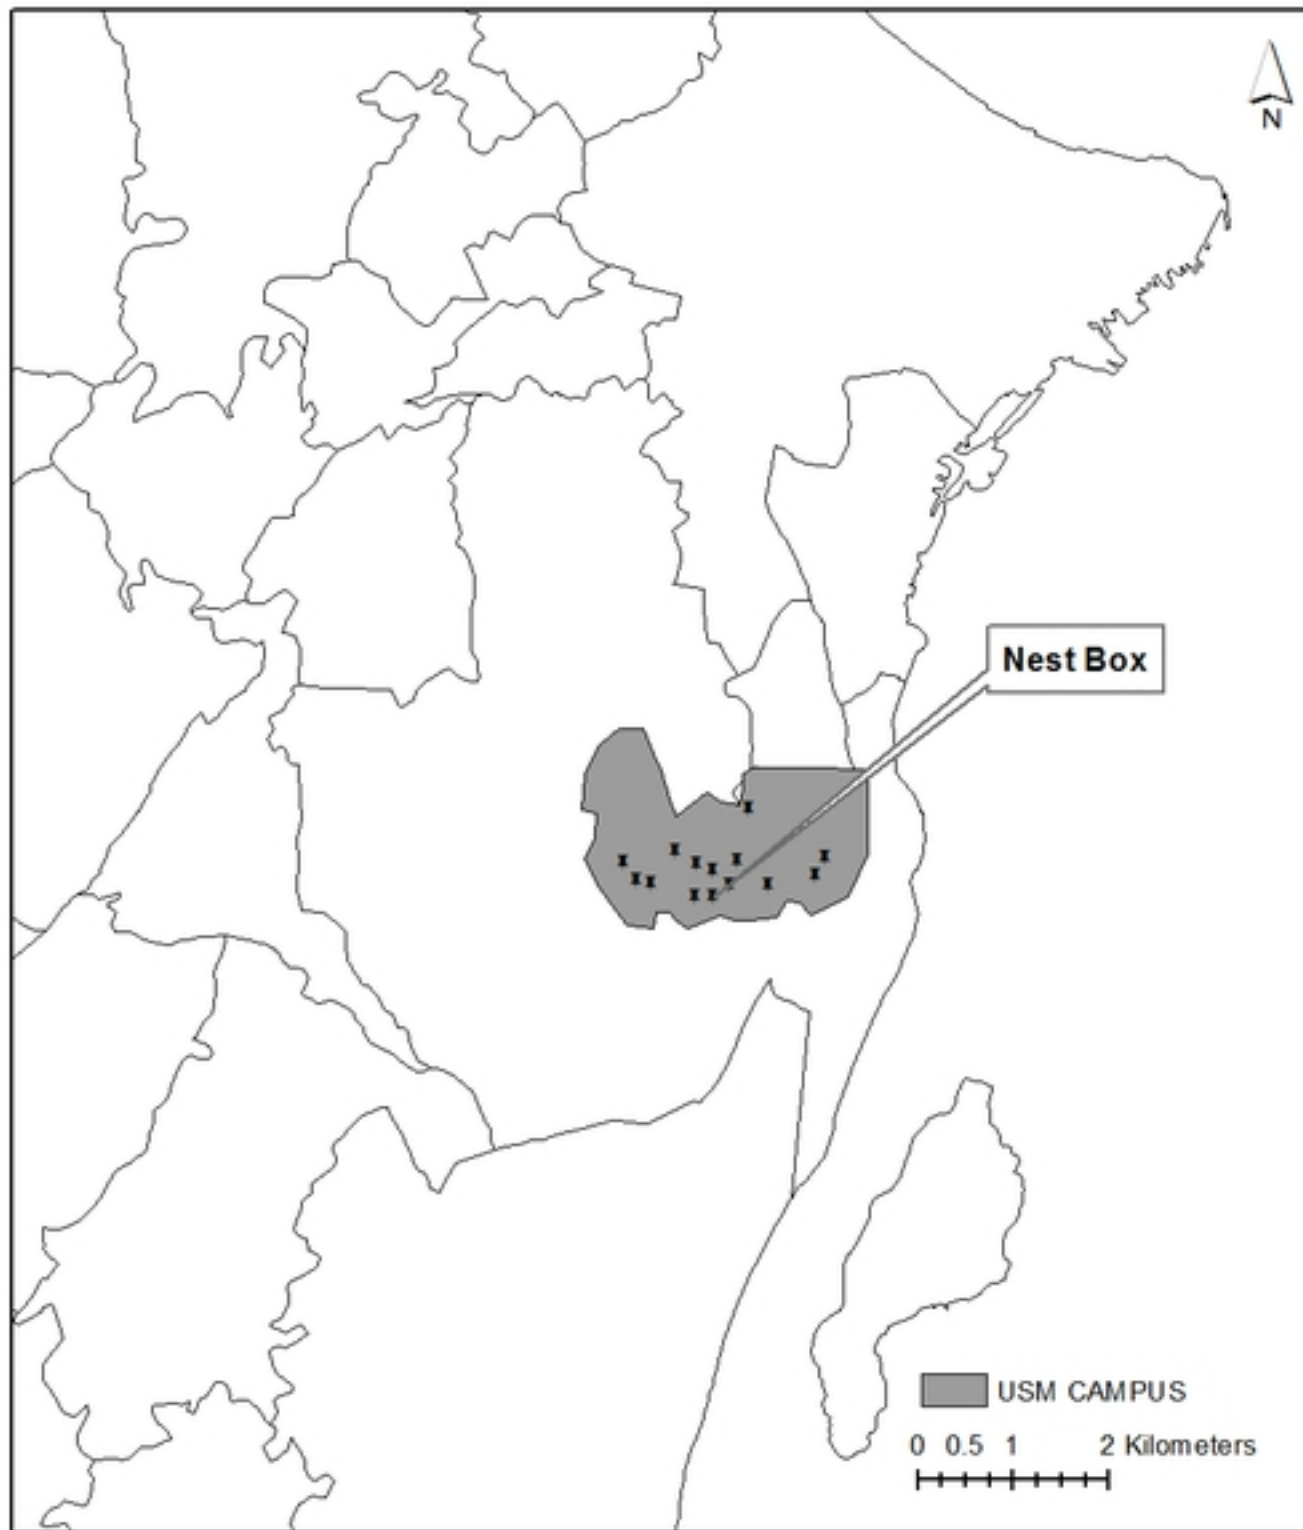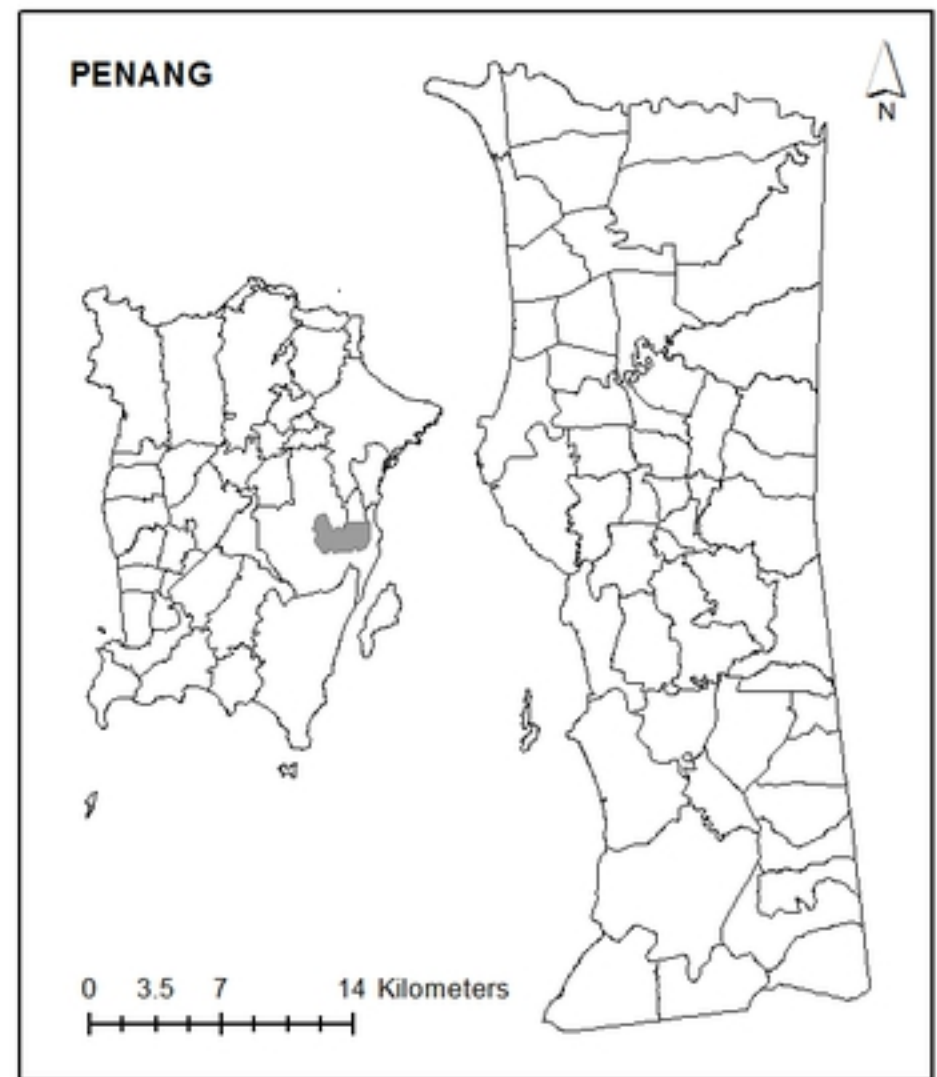

Figure 1

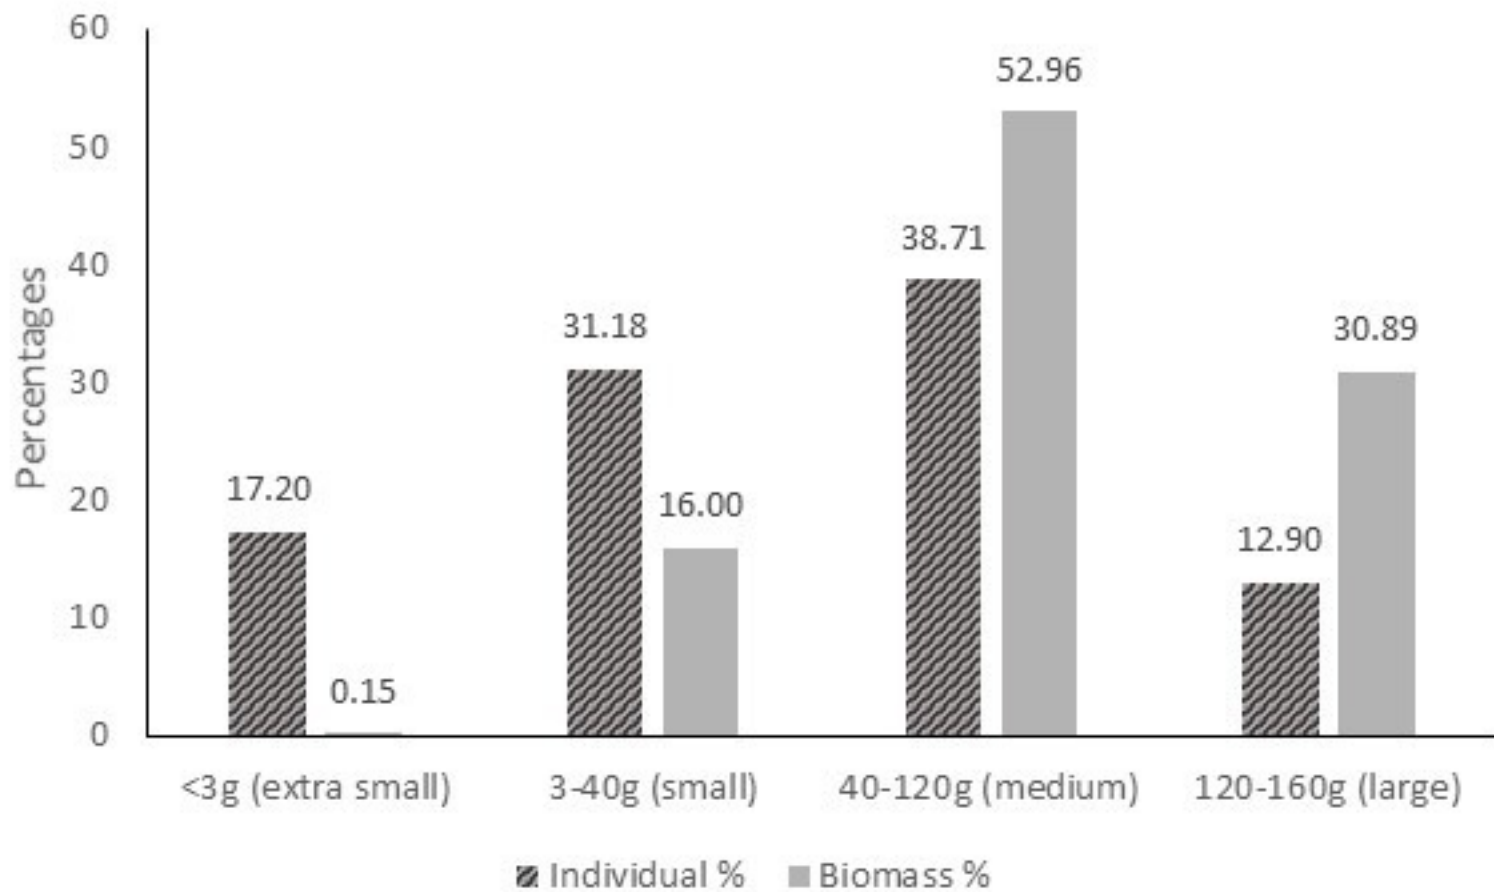

Figure 2

Percentage of individual *R. norvegicus* prey consumed (%)

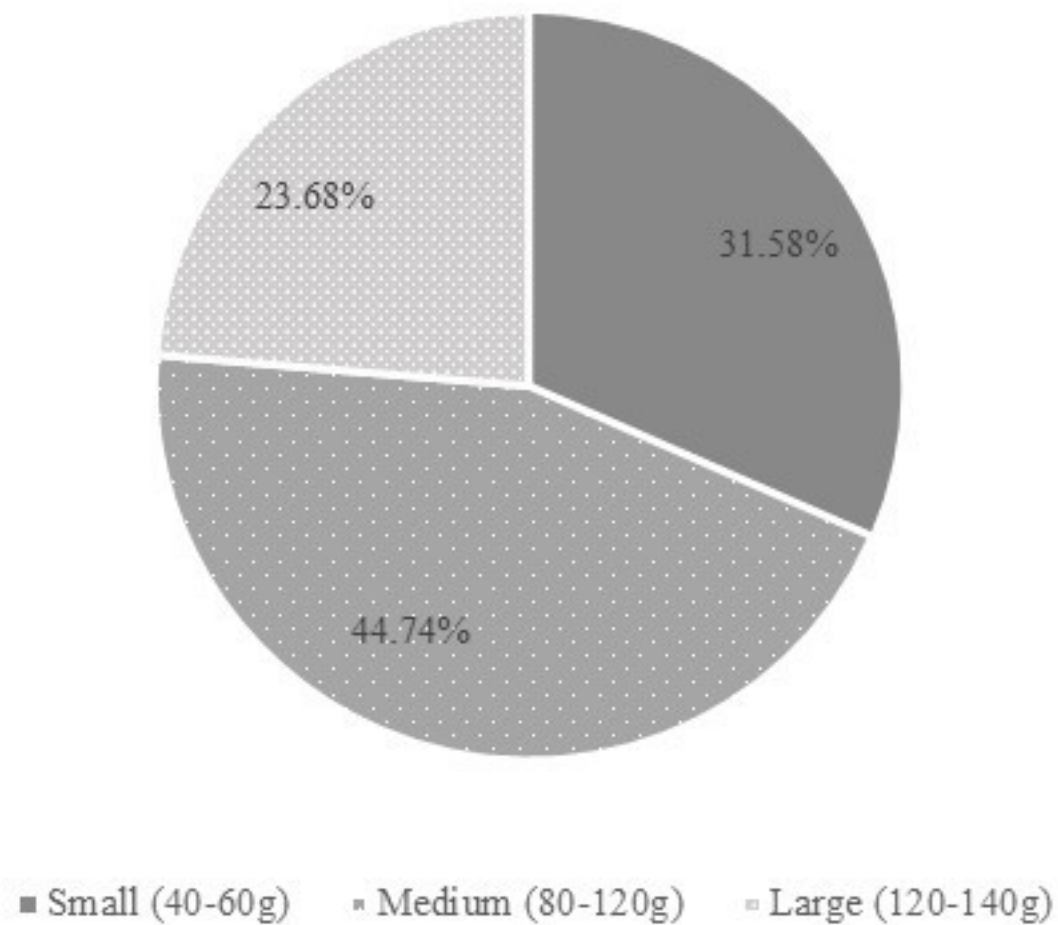

Figure 3
